# Supplementary material
Source: PubMed Central journal article supplement (PMC8370708)
Supplement: NIHMS1718676-supplement-1.pdf [file NIHMS1718676-supplement-1.pdf]

433 **Supplementary Materials:**

434 Pontzer et al. *Daily Energy Expenditure through the Human Life Course*

435 **Contents:**

436 Materials and Methods

- 437 1. Doubly Labeled Water Database
  - 438 2. Basal Expenditure, Activity Expenditure, and PAL
  - 439 3. Predictive Models for TEE, BEE, AEE, and PAL
  - 440 4. Adjusted TEE, Adjusted BEE, and Adjusted  $BEE_{TEE}$
  - 441 5. Segmented Regression Analysis
  - 442 6. Organ Size and BEE
  - 443 7. Modeling the Effects of PA and Cellular Metabolism
  - 444 8. Physical Activity, Activity Expenditure and PAL
  - 445 9. The IAEA DLW database consortium
- 446 Figures S1-S10
- 447 Tables S1-S4

448 **Material and Methods**

449 1. Doubly Labeled Water Database

450 Data were taken from IAEA Doubly Labelled Water (DLW) Database, version 3.1,  
451 completed April, 2020 (16). This version of the database comprises 6,743 measurements of total  
452 expenditure using the doubly labeled water method. Of these, a total of 6,421 had valid data for  
453 total expenditure, fat free mass, fat mass, sex, and age. These 6,421 measurements were used in  
454 this analysis. This dataset was augmented with published basal expenditure measurements for  
455  $n=136$  neonates and infants (31-36) that included fat free mass and fat mass. Malnourished or

456 preterm infants were excluded. For sources that provided cohort means rather than individual  
457 subject measurements (33, 36) means were entered as single values into the dataset without  
458 reweighting to reflect sample size. This approach resulted in 77 measures of basal expenditure,  
459 fat free mass, and fat mass for n=136 subjects. We also added to the dataset published basal and  
460 total expenditure measurements of n=141 women before, during, and after pregnancy (37-39)  
461 that included fat free mass and fat mass. These measurements were grouped as pre-pregnancy, 1<sup>st</sup>  
462 trimester, 2<sup>nd</sup> trimester, 3<sup>rd</sup> trimester, and post-partum for analysis.

463         In the doubly labeled water method (5), subjects were administered a precisely measured  
464 dose of water enriched in  $^2\text{H}_2\text{O}$  and  $\text{H}_2^{18}\text{O}$ . The subject's body water pool is thus enriched in  
465 deuterium ( $^2\text{H}$ ) and  $^{18}\text{O}$ . The initial increase in body water enrichment from pre-dose values is  
466 used to calculate the size of the body water pool, measured as the dilution space for deuterium  
467 ( $N_d$ ) and  $^{18}\text{O}$  ( $N_o$ ). These isotopes are then depleted from the body water pool over time: both  
468 isotopes are depleted *via* water loss, whereas  $^{18}\text{O}$  is also lost *via* carbon dioxide production.  
469 Subtracting the rate (%/d) of deuterium depletion ( $k_d$ ) from the rate of  $^{18}\text{O}$  depletion ( $k_o$ ), and  
470 multiplying the size of the body water pool (derived from  $N_d$  and  $N_o$ ) provided the rate of carbon  
471 dioxide production,  $r\text{CO}_2$ . Entries in the DLW database include the original k and N values for  
472 each subject, which were then used to calculate  $\text{CO}_2$  using a common equation that has been  
473 validated in subjects across the lifespan (17). The rate of  $\text{CO}_2$  production, along with each  
474 subject's reported food quotient, was then used to calculate energy expenditure (MJ/d) using the  
475 Weir equation (40). We used the food quotients reported in the original studies to calculate total  
476 energy expenditure from  $r\text{CO}_2$  for each subject.

477         The size of the body water pool, determined from  $N_d$  and  $N_o$ , was used to establish FFM,  
478 using hydration constants for fat free mass taken from empirical studies. Other anthropometric

479 variables (age, height, body mass, sex) were measured using standard protocols. Fat mass was  
480 calculated as (body mass) – (fat free mass).

## 481 2. Basal Expenditure, Activity Expenditure, and Physical Activity Level (PAL)

482 A total of 2,008 subjects in the database had associated basal expenditure, measured *via*  
483 respirometry. For these subjects, we analyzed basal expenditure, activity expenditure, and  
484 “physical activity level” (PAL). Activity expenditure was calculated as  $[0.9(\text{total expenditure}) -$   
485  $(\text{basal expenditure})]$  which subtracts basal expenditure and the assumed thermic effect of food  
486 [estimated at  $0.1(\text{total expenditure})]$  from total expenditure. The PAL ratio was calculated as  
487  $(\text{total expenditure})/(\text{basal expenditure})$ . As noted above, the basal expenditure dataset was  
488 augmented with measurements from neonates and infants, but these additional measures do not  
489 have associated total expenditure and could not be used to calculate activity expenditure or PAL.

## 490 3. Predictive Models for Total, Basal, and Activity Expenditures and PAL

491 We used general linear models to regress measures of energy expenditure against  
492 anthropometric variables. We used the base package in R version 4.0.3 (41) for all analyses.  
493 General linear models were implemented using the `lm` function. These models were used to  
494 develop predictive equations for total expenditure for clinical and research applications, and to  
495 determine the relative contribution of different variables to total expenditure and its components.  
496 Given the marked changes in metabolic rate over the lifespan (Figure 1, Figure 2) we calculated  
497 these models separately for each life history stage: infants (0 – 1 y), juveniles (1 – 20 y), adults  
498 (20 – 60 y), and older adults (60+ y). These age ranges were identified using segmented  
499 regression analysis. Results of these models are shown in Table S2.

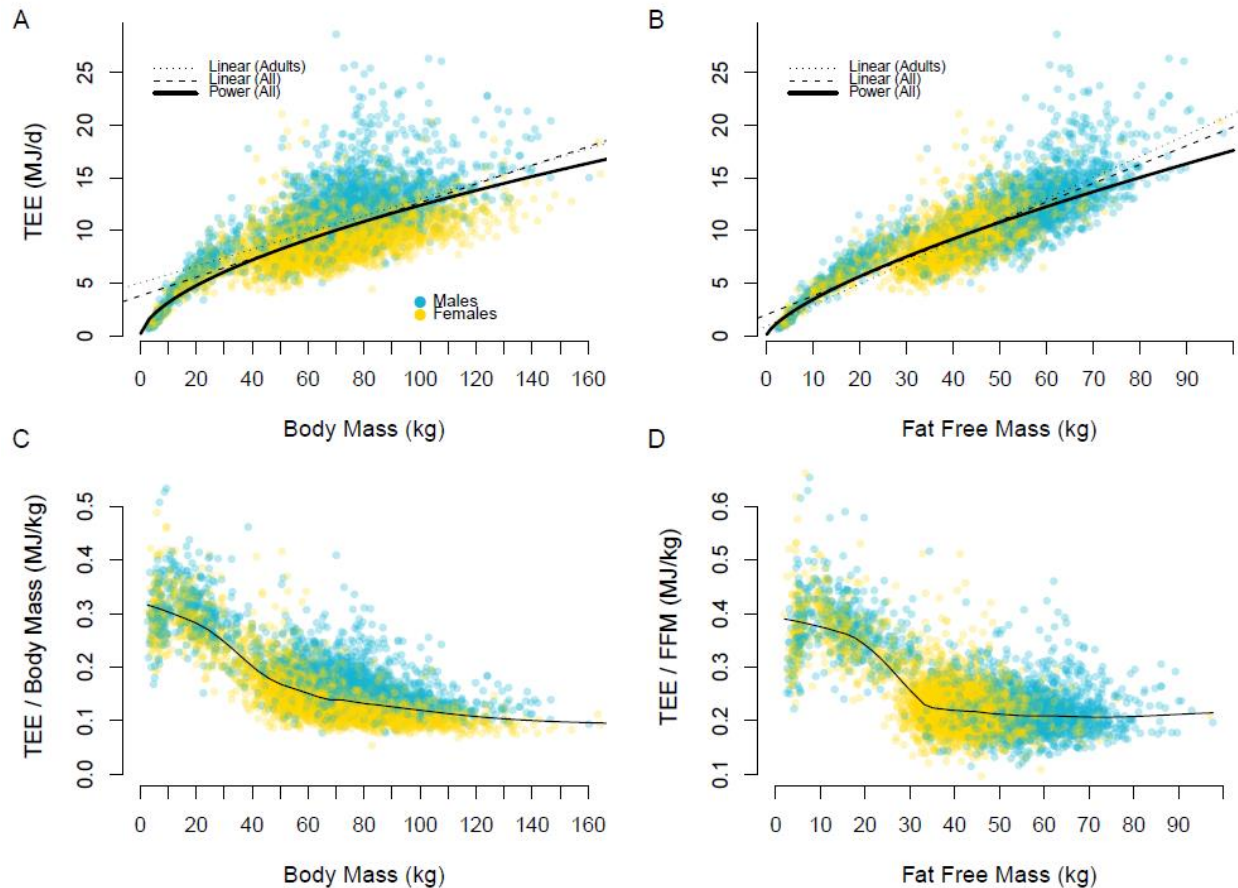

500

501 **Figure S1.** Total expenditure (TEE) increases with body size in a power-law manner. For the entire  
 502 dataset ( $n = 6,407$ ): **A.** the power-law regression for total body mass ( $\ln TEE = 0.593 \pm 0.004 \ln Mass -$   
 503  $0.214 \pm 0.018$ ,  $p < 0.001$ , adj.  $r^2 = 0.73$ , model std. err. = 0.223,  $df = 6419$ ) is less predictive than the  
 504 regression for **B.** fat free mass ( $\ln TEE = 0.708 \pm 0.004 \ln FFM - 0.391 \pm 0.015$ ,  $p < 0.001$ , adj.  $r^2 = 0.83$ ,  
 505 model std. err. = 0.176,  $df = 6419$ ). For both body mass and fat free mass regressions, power-law  
 506 regressions outperform linear models, particularly at the smallest body sizes. For all models, for both  
 507 body mass and fat free mass, children have elevated total expenditure, clustering above the trend line.  
 508 Children also exhibit elevated basal and activity expenditures (Figure S2). Power-law regressions have  
 509 an exponent  $< 1.0$ , and linear regressions (dashed: linear regression through all data; dotted: linear  
 510 regression through adults only) have a positive intercept, indicating that simple ratios of **C.** (total  
 511 expenditure)/(body mass) or **D.** (total expenditure)/(fat free mass) do not adequately control for  
 512 differences in body size (18) as smaller individuals will tend to have higher ratios. Lines in **C** and **D**  
 513 are loess with span 1/6. In body mass regressions (panel **A**, power and linear models) and the ratio of (total  
 514 expenditure)/(body mass) (**C**), adult males cluster above the trend line while females cluster below due to  
 515 sex differences in body composition. In contrast, males and females fit the fat free mass regressions (**B**)  
 516 and ratio (**D**) equally well.

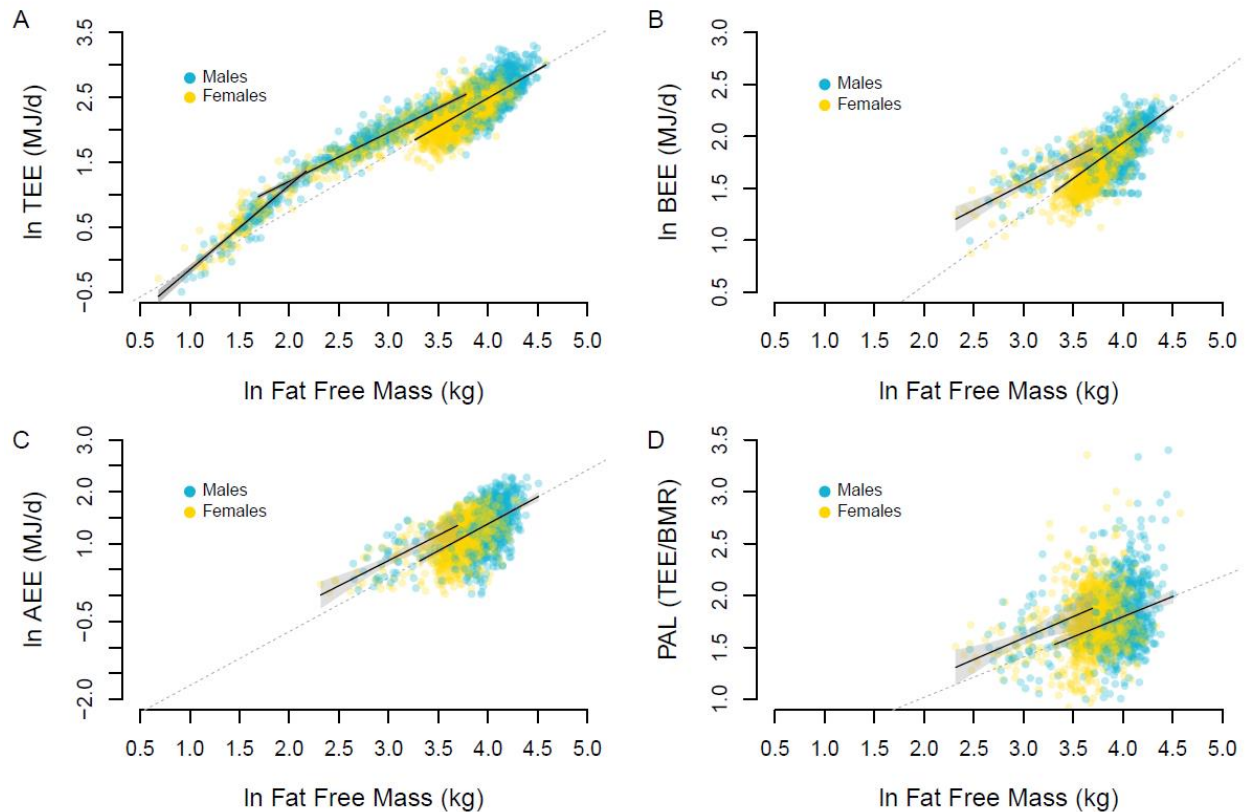

517

518 **Figure S2.** Infants and children exhibit different relationships between fat free mass and expenditure and  
 519 the PAL ratio. **A:** For total expenditure (TEE), regressions for infants (age <1 y, left regression line) and  
 520 adults (right regression line) intersect for neonates, at the smallest body size. However, the slopes differ,  
 521 with the infants' regression and 95% CI (gray region) falling outside of that for adults (age 20 – 60 y,  
 522 extrapolated dashed line). Juvelines (age 1 – 20 y, middle regression line) are elevated, with a regression  
 523 outside the 95% CI of adults. Juvenile (1 – 20 y) regressions (with 95%CI) are also elevated for basal  
 524 expenditure (BEE) (**B**), activity expenditure (AEE) (**C**), and PAL (**D**) compared to adults (20 – 60 y). Sex  
 525 differences in expenditure (**A-D**) are attributable to differences in fat free mass. Note that total and basal  
 526 expenditures are measured directly. Activity expenditure is calculated as  $(0.9TEE - BEE)$ , and PAL is  
 527 calculated as  $(TEE/BEE)$ ; see Methods.

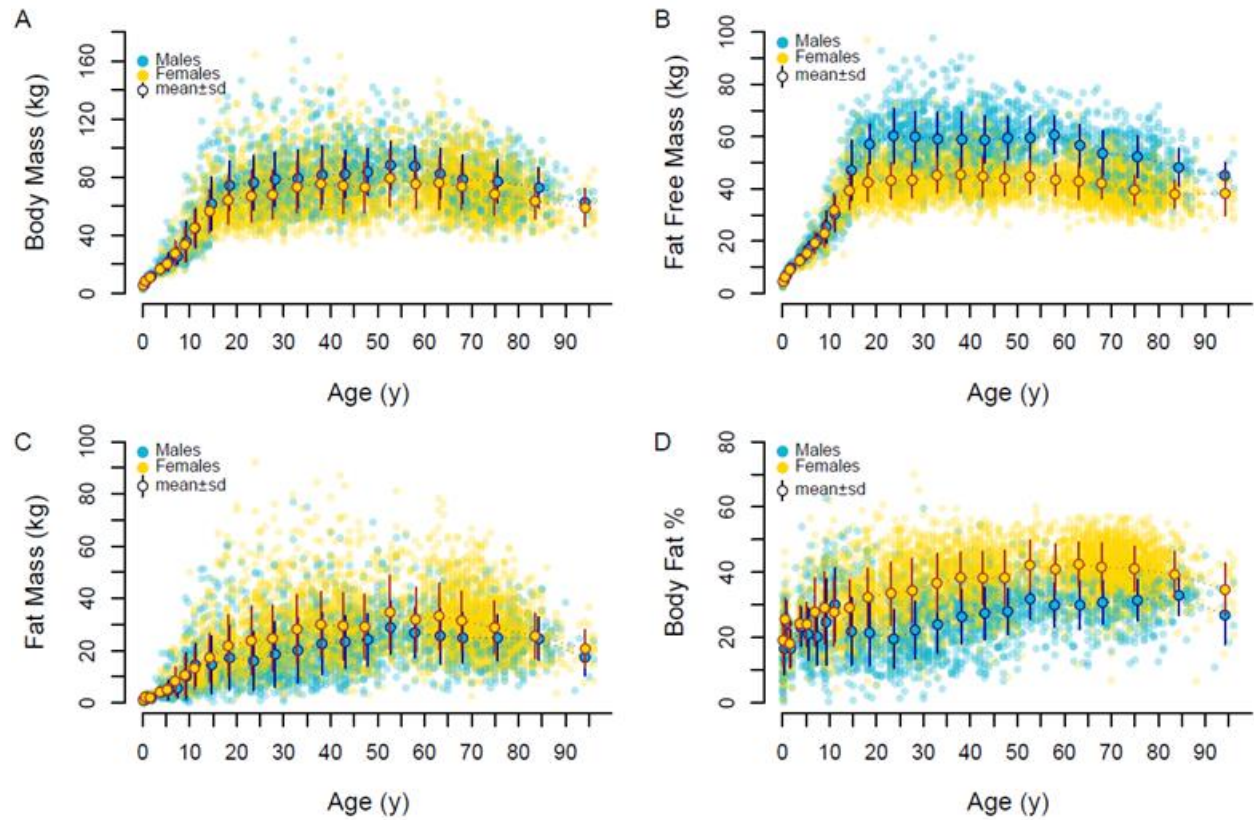

528

529 **Figure S3.** Changes in body composition over the lifespan: **A.** Body mass; **B.** Fat free mass; **C.** Fat Mass;

530 and **D.** Body fat percentage.

531 4. Adjusted Expenditures

532 We used general linear models with fat free mass and fat mass in adults (20 – 60 y) to  
533 calculate adjusted total expenditure and adjusted basal expenditure. The 20 – 60 y age range was  
534 used as the basis for analyses because segmented regression analysis consistently identified this  
535 period as stable with respect to size-adjusted total expenditure (see below).

536 We used models 2 and 5 in Table S2, which have the form  $\ln(\text{Expenditure}) \sim \ln(\text{FFM}) +$   
537  $\ln(\text{Fat Mass})$  and were implemented using the `lm` function in base R version 4.0.3 (41). We  
538 used  $\ln$ -transformed variables due to the inherent power-law relationship between body size and  
539 both total and basal expenditure (ref. 2; see Figure 1, Figure S1). Predicted values for each  
540 subject, given their fat free mass and fat mass, were calculated from the model using the  
541 `pred()` function; these  $\ln$ -transformed values were converted back into MJ as  $\exp(\text{Predicted})$ .  
542 Residuals for each subject were calculated as (Observed – Predicted) expenditure, and were then  
543 used to calculate adjusted expenditures as:

544 
$$\text{Adjusted Expenditure} = 1 + \text{Residual} / \text{Predicted} \quad [1]$$

545 The advantage of expressing residuals as a percentage of the predicted value is that it allows us  
546 to compare residuals across the range of age and body size in the dataset. Raw residuals (MJ) do  
547 not permit direct comparison because the relationship between size and expenditure is  
548 heteroscedastic; the magnitude of residuals increases with size (see Figure S1). Ln-transformed  
549 residuals ( $\ln\text{MJ}$ ) avoid this problem but are more difficult to interpret. Adjusted expenditures,  
550 used here, provide an easily interpretable measure of deviation from expected values. An  
551 adjusted expenditure value of 100% indicates that a subject's observed total or basal expenditure  
552 matches the value predicted for their fat free mass and fat mass, based on the general linear  
553 model derived for adults. An adjusted expenditure of 120% indicates an observed total or basal

554 expenditure value that exceeds the predicted value for their fat free mass and fat mass by 20%.  
555 Similarly, an adjusted expenditure of 80% means the subject's measured expenditure was 20%  
556 lower than predicted for their fat free mass and fat mass using the adult model. Adjusted total  
557 expenditure and adjusted basal expenditure values for each age-sex cohort are given in Table S3.  
558 Within each metabolic life history stage we used general linear models (`lm` function in R) to  
559 investigate the effects of sex and age on adjusted total and basal expenditure.

560 This same approach was used to calculate adjusted basal expenditure as a proportion of  
561 total expenditure (Figure 2D), hereafter termed adjusted  $BEE_{TEE}$ .  $Residual_{BEE-TEE}$ , the deviation  
562 of observed basal expenditure from the adult total expenditure regression (eq. 2 in Table S2),  
563 was calculated as (Observed Basal Expenditure – Predicted Total Expenditure) and then used to  
564 calculate adjusted  $BEE_{TEE}$  as

$$565 \quad \text{Adjusted } BEE_{TEE} = 1 + Residual_{BEE-TEE} / \text{Predicted Total Expenditure} \quad [2]$$

566 When adjusted  $BEE_{TEE} = 80\%$ , observed basal expenditure is equal to 80% of predicted total  
567 expenditure given the subject's fat free mass and fat mass. Adjusted  $BEE_{TEE}$  is equivalent to  
568 adjusted basal expenditure (Figure S4) but provides some analytical advantages. The derivation  
569 of adjusted  $BEE_{TEE}$  approach applies identical manipulations to observed total expenditure and  
570 observed basal expenditure and therefore maintains them in directly comparable units. The ratio  
571 of (adjusted total expenditure)/(adjusted basal expenditure) is identical to the PAL ratio of (total  
572 expenditure)/(basal expenditure), and the difference (0.9adjusted total expenditure– adjusted  
573 basal expenditure) is proportional to activity expenditure (Figure S4). Plotting adjusted total  
574 expenditure and adjusted  $BEE_{TEE}$  over the lifespan (Figure 2D) therefore shows both the relative  
575 magnitudes of total and basal expenditure and their relationship to one another in comparable  
576 units.



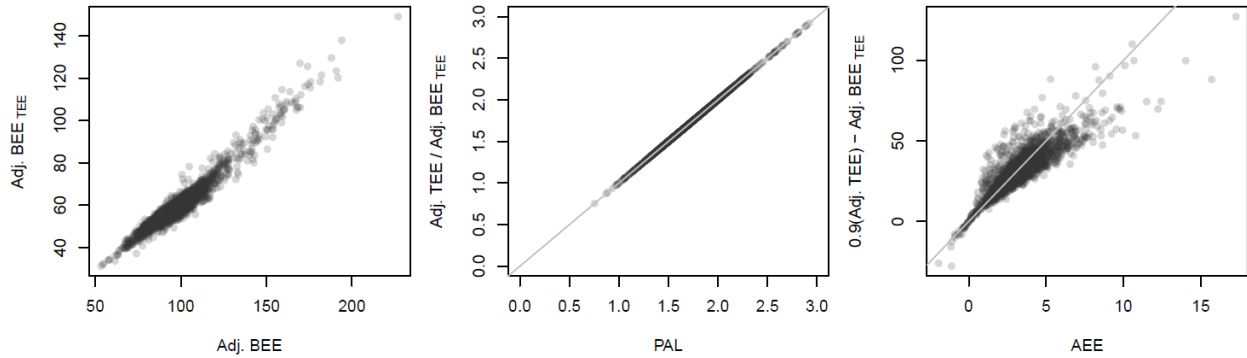

577

578 **Figure S4.** Left: Adjusted BEE<sub>TEE</sub> corresponds strongly to adjusted basal expenditure (Adj. BEE). Center:  
 579 The ratio of adjusted total expenditure (adj. TEE) to adjusted BEE<sub>TEE</sub> is identical to the PAL ratio. Right:  
 580 The difference (0.9adjusted total expenditure – adjusted BEE<sub>TEE</sub>) is proportional to activity energy  
 581 expenditure (AEE). Gray lines: center panel:  $y = x$ , right panel:  $y = 10x$ .

582 5. Segmented Regression Analysis

583 We used segmented regression analysis to determine the change points in the relationship  
 584 between adjusted expenditure and age. We used the Segmented (version 1.1-0) package in R  
 585 (42). For adjusted total expenditure, we examined a range of models with 0 to 5 change points,  
 586 using the `npsi=` term in the `segmented()` function. This approach does not specify the  
 587 location or value of change points, only the number of them. Each increase in the number of  
 588 change points from 0 to 3 improved the model adj.  $R^2$  and standard error considerably.

589 Increasing the number of change points further to 4 or 5 did not improve the model, and the  
 590 additional change points identified by the `segmented()` function fell near the change points for  
 591 the 3-change point model. We therefore selected the 3-change point model as the best fit for  
 592 adjusted total expenditure in this dataset. Segmented regression results are shown in Table S4. A  
 593 similar 3-change point segmented regression approach was conducted for adjusted basal  
 594 expenditure (Figure S4) and adjusted BEE<sub>TEE</sub> (Figure 2D). We note that the decline in adjusted  
 595 basal expenditure and adjusted BEE<sub>TEE</sub> in older adults begins earlier (as identified by segmented

596 regression analysis) than does the decline in adjusted total expenditure among older adults.  
597 However, this difference may reflect the relative paucity of basal expenditure measurements for  
598 subjects 40 – 60 y. Additional measurements are needed to determine whether the decline in  
599 basal expenditure does in fact begin earlier than the decline in total expenditure. Here, we view  
600 the timing as essentially coincident and interpret the change point in adjusted total expenditure  
601 (~60 y), which is determined with a greater number of measurements, as more accurate and  
602 reliable.

603         Having established that 3 break points provided the best fit for this dataset, we examined  
604 whether changes in the age range used to calculate adjusted total energy expenditure affected the  
605 age break-points identified by segmented regression. When the age range used to calculate  
606 adjusted expenditure was set at 20 – 60 y, the set of break point (95% CI) was: 0.69 (0.61-0.76),  
607 20.46 (19.77-21.15), 62.99 (60.14-65.85). When the age range was expanded to 15 – 70 y, break  
608 points determined through segmented regression were effectively unchanged: 0.69 (0.62 – 0.76),  
609 21.40 (20.60-22.19), 61.32 (58.60-64.03). Break points were also unchanged when the initial age  
610 range for adjusted expenditure was limited to 30 – 50 y: 0.69 (0.62-0.77), 20.56 (19.84-21.27),  
611 62.85 (59.97-65.74).

612

**A**

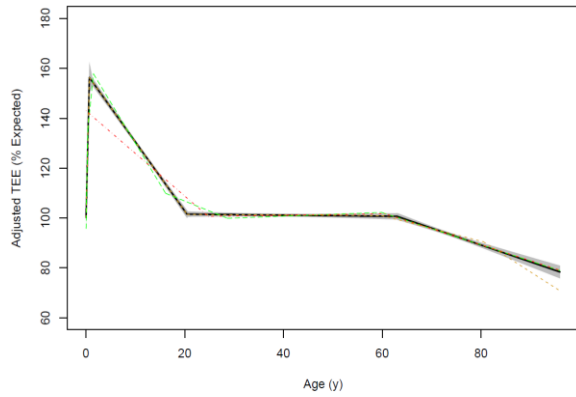

**B**

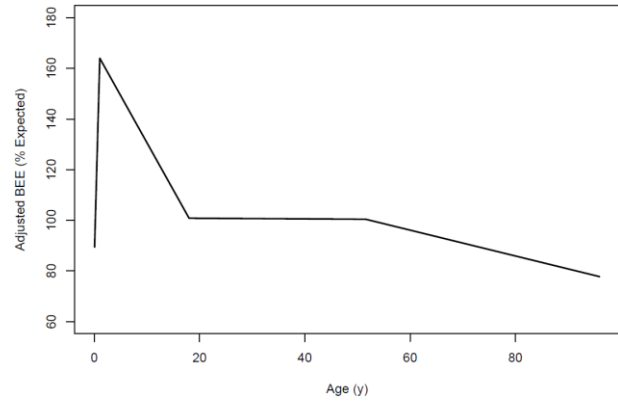

613

614 **Figure S5.** Segmented regression analysis of adjusted TEE (**A**) and adjusted BEE (**B**). In both panels,  
615 the black line and gray shaded confidence region depicts the 3 change-point regression. For adjusted  
616 TEE, segmented regressions are also shown for 2 change points (red), 4 change points (yellow), and 5  
617 change points (green). Segmented regression statistics are given in Table S4.

618 6. Organ Size and Basal Expenditure

619 Measuring the metabolic rate of individual organs is notoriously challenging, and the  
620 available data come from only a small number of studies. The available data indicate that organs  
621 differ markedly in their mass-specific metabolic rates at rest (43). The heart ( $1848 \text{ kJ kg}^{-1} \text{ d}^{-1}$ ),  
622 liver ( $840 \text{ kJ kg}^{-1} \text{ d}^{-1}$ ), brain ( $1008 \text{ kJ kg}^{-1} \text{ d}^{-1}$ ), and kidneys ( $1848 \text{ kJ kg}^{-1} \text{ d}^{-1}$ ) have much greater  
623 mass-specific metabolic rates at rest than do muscle ( $55 \text{ kJ kg}^{-1} \text{ d}^{-1}$ ), other lean tissue ( $50 \text{ kJ kg}^{-1}$   
624  $\text{d}^{-1}$ ), and fat ( $19 \text{ kJ kg}^{-1} \text{ d}^{-1}$ ). Consequently, the heart, liver, brain, and kidneys combined account  
625 for ~60% of basal expenditure in adults (21, 22, 44, 45). In infants and children, these  
626 metabolically active organs constitute a larger proportion of body mass. The whole body mass-  
627 specific basal expenditure [i.e., (basal expenditure)/(body mass), or (basal expenditure)/(fat free  
628 mass)] for infants and children is therefore expected to be greater than adults' due to the greater  
629 proportion of metabolically active organs early in life adults (21, 22, 44, 45). Similarly, reduced  
630 organ sizes in elderly subjects may result in declining basal expenditure (21).

631 To examine this effect of organ size on basal expenditure in our dataset, we used  
632 published references for organ size to determine the mass of the metabolically active organs  
633 (heart, liver, brain, and kidneys) as a percentage of body mass or fat free mass for subjects 0 – 12  
634 y (22, 44-46), 15 to 60 y (21, 22), and 60 to 100 y (21, 47). We used these relationships to  
635 estimate the combined mass of the metabolically active organs (heart, liver, brain, kidneys) for  
636 each subject in our dataset. We then subtracted the mass of the metabolically active organs from  
637 measured fat free mass to calculate the mass of “other fat free mass”. These two measures, along  
638 with measured fat mass, provided a three-compartment model for each subject: metabolically  
639 active organs, other fat free mass, and fat (Figure S6A).

640 Following previous studies (21-25), we assigned mass-specific metabolic rates to each  
641 compartment and estimated basal expenditure for each subject. We used reported mass-specific  
642 metabolic rates for the heart, liver, brain, and kidneys (see above; (43)) and age-related changes  
643 in the proportions of these organs for subjects 0 – 12 y (22, 46), 15 to 60 y (21-25), and 60 to 100  
644 y (21, 23, 25, 47) to calculate an age-based weighted mass-specific metabolic rate for the  
645 metabolically active organ compartment. We averaged the mass-specific metabolic rates of  
646 resting muscle and other lean tissue (see above; (21, 22)) and assigned a value of  $52.5 \text{ kJ kg}^{-1} \text{ d}^{-1}$   
647 to “other fat free mass”, and we used a mass-specific metabolic rate of  $19 \text{ kJ kg}^{-1} \text{ d}^{-1}$  for fat.

648 Results are shown in Figure S6. Due to the greater proportion of metabolically active  
649 organs in early life, the estimated basal expenditure from the three-compartment model follows a  
650 power-law relationship with FFM (using age cohort means,  $\text{BEE} = 0.38 \text{ FFM}^{0.75}$ ; Figure S6B)  
651 that is similar to that calculated from observed basal expenditure in our dataset (see Table S2 and  
652 *7. Modeling the Effects of Physical Activity and Tissue Specific Metabolism*, below). Estimated  
653 BEE from the three-compartment model produced mass-specific metabolic rates that are  
654 considerably higher for infants and children than for adults and roughly consistent with observed  
655 age-related changes in (basal expenditure)/(fat free mass) (Figure S6C). Thus, changes in organ  
656 size can account for much of the variation in basal expenditure across the lifespan observed in  
657 our dataset.

658 Nonetheless, observed basal expenditure was ~30% greater early in life, and ~20% lower  
659 in older adults, than estimated basal expenditure from the three-compartment model (Figure  
660 S6D). The departures from estimated basal expenditure suggest that the mass-specific metabolic  
661 rates of one or more organ compartments are considerably higher early in life, and lower late in  
662 life, than they are in middle-aged adults, consistent with previous assessments (21-25). It is

663 notable, in this context, that observed basal expenditure for neonates is nearly identical to basal  
664 expenditure estimated from the three-compartment model, which assumes adult-like tissue  
665 metabolic rates (Figure S6B,C,D). Observed basal expenditure for neonates is thus consistent  
666 with the hypothesis that the mass-specific metabolic rates of their organs are similar to those of  
667 other adults, specifically the mother.

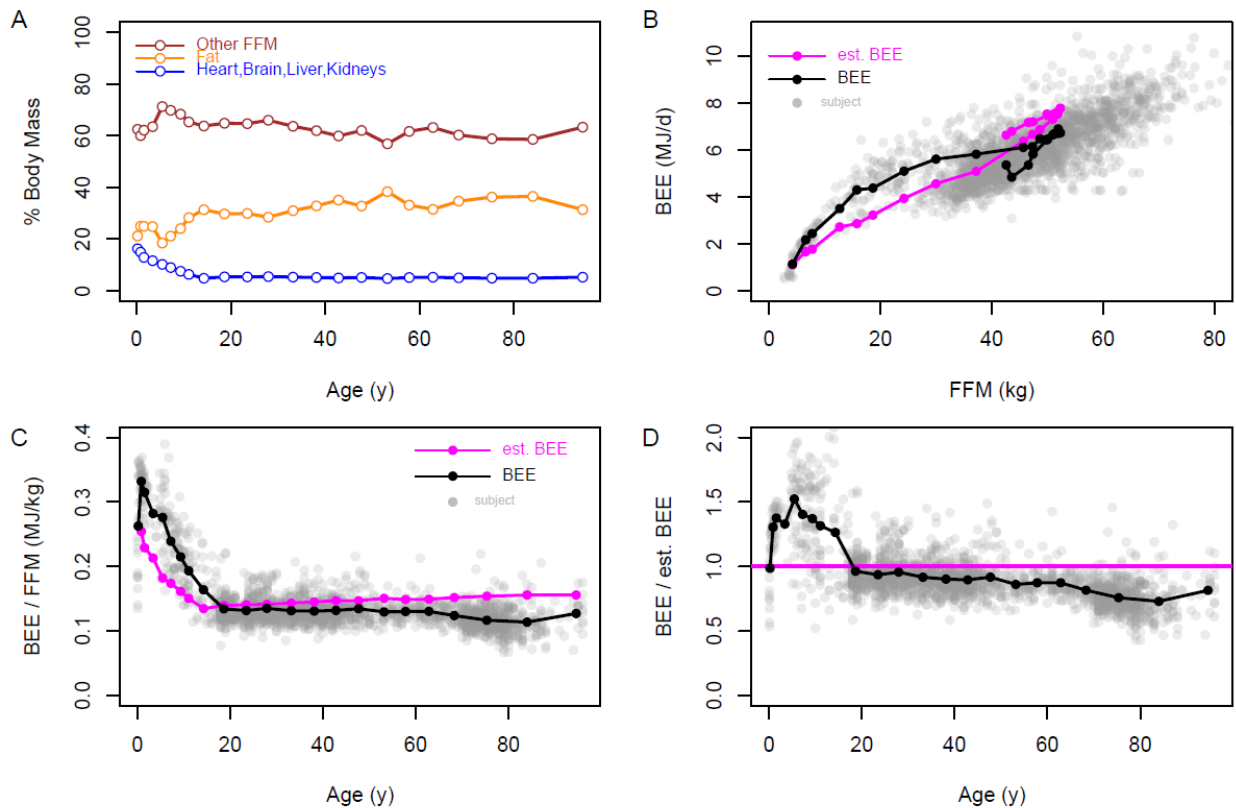

668  
669 **Figure S6. Organ sizes and BEE.** **A.** The relative proportions of metabolically active organs (heart,  
670 brain, liver, kidneys), other fat free mass (FFM), and fat changes over the life course. Age cohort means  
671 are shown. **B.** Consequently, estimated basal expenditure (BEE) from the three-compartment model  
672 increases with fat free mass (FFM) in a manner similar to observed basal expenditure, with **C.** greater  
673 whole body mass-specific basal expenditure (BEE/FFM) early in life. **D.** Observed basal expenditure is  
674 ~30% greater early in life, and ~20% lower after age 60 y, than estimated basal expenditure from the  
675 three-compartment model (shown as the ratio of BEE/est.BEE). In panels **B**, **C**, and **D**, age-cohort means  
676 for observed (black) and estimated (magenta) basal expenditure are shown.

677 7. Modeling the Effects of Physical Activity and Tissue Specific Metabolism

678 We constructed two simple models to examine the contributions of physical activity and  
679 variation in tissue metabolic rate to total and basal expenditure. In the simplest version, we used  
680 the observed relationship between basal expenditure and fat free mass for all adults 20 – 60 y  
681 determined from linear regression of  $\ln(\text{basal expenditure})$  and  $\ln(\text{fat free mass})$  (untransformed  
682 regression equation:  $\text{basal expenditure} = 0.32 (\text{fat free mass})^{0.75}$ ,  $\text{adj. } r^2 = 0.60$ ,  $\text{df} = 1684$ ,  $p <$   
683  $0.0001$ ) to model basal expenditure as

$$684 \quad \text{Basal expenditure} = 0.32 \text{ TM}_{\text{age}} (\text{fat free mass})^{0.75} \quad [3]$$

685 The  $\text{TM}_{\text{age}}$  term is tissue metabolic rate, a multiplier between 0 and 2 reflecting a relative  
686 increase ( $\text{TM}_{\text{age}} > 1.0$ ) or decrease ( $\text{TM}_{\text{age}} < 1.0$ ) in organ metabolic rate relative that expected  
687 from the power-law regression for adults. Note that, even when  $\text{TM}_{\text{age}} = 1.0$ , smaller individuals  
688 are expected to exhibit greater mass-specific basal expenditure (that is, a greater basal  
689 expenditure per kg body weight) due to the power-law relationship between basal expenditure  
690 and fat free mass. Further, we note that the power-law relationship between basal expenditure  
691 and fat free mass for adults is similar to that produced when estimating basal expenditure from  
692 organ sizes (see *Organ Size and Basal Expenditure*, above). Thus, variation in  $\text{TM}_{\text{age}}$  reflects  
693 modeled changes in tissue metabolic rate *in addition* to power-law scaling effects, and also, in  
694 effect, in addition to changes in basal expenditure due to age-related changes in organ size and  
695 proportion. To model variation in organ activity over the lifespan, we either 1) maintained  $\text{TM}_{\text{age}}$   
696 at adult levels ( $\text{TM}_{\text{age}} = 1.0$ ) over the entire lifespan, or 2) had  $\text{TM}_{\text{age}}$  follow the trajectory of  
697 adjusted basal expenditure with age (Figure S8).

698 To incorporate effects of fat mass into the model, we constructed a second version of the  
699 model in which basal expenditure was modeled following the observed relationship with FFM  
700 and fat mass for adults 20 – 60 y,

$$701 \quad \text{Basal expenditure} = 0.32 \text{ TM}_{\text{age}} (\text{fat free mass})^{0.7544} (\text{fat mass})^{0.0003} \quad [4]$$

702 As with the fat free mass model (eq. 3), we either maintained  $\text{TM}_{\text{age}}$  at 1.0 over the life span or  
703 modeled it using the trajectory of adjusted basal expenditure.

704 Activity expenditure was modeled as a function of physical activity and body mass  
705 assuming larger individuals expend more energy during activity. We began with activity  
706 expenditure, calculated as  $[0.9(\text{total expenditure}) - (\text{basal expenditure})]$  as described above. The  
707 observed ratio of  $(\text{activity expenditure})/(\text{fat free mass})$  for adults 20 – 60 y was  $0.07 \text{ MJ d}^{-1} \text{ kg}^{-1}$ .  
708 We therefore modeled activity expenditure as

$$709 \quad \text{Activity expenditure} = 0.07 \text{ PA}_{\text{age}} (\text{fat free mass}) \quad [5]$$

710 To incorporate effects of fat mass, we constructed a second version using the ratio of (activity  
711 expenditure)/(body weight) for adults 20 – 60y,

$$712 \quad \text{Activity expenditure} = 0.04 \text{ PA}_{\text{age}} (\text{body weight}) \quad [6]$$

713 In both equations,  $\text{PA}_{\text{age}}$  represents the level of physical activity relative to the mean value for 20  
714 – 60 y adults.  $\text{PA}_{\text{age}}$  could either remain constant at adult levels ( $\text{PA}_{\text{age}}=1.0$ ) over the lifespan or  
715 follow the trajectory of physical activity measured *via* accelerometry, which peaks between 5 –  
716 10 y, declines rapidly through adolescence, and then declines more slowly beginning at ~40 y  
717 (11-13, 26, 27, 48-51). Different measures of physical activity (*e.g.*, moderate and vigorous PA,  
718 mean counts per min., total accelerometry counts) exhibit somewhat different trajectories over  
719 the lifespan, but the patterns are strongly correlated; all measures show the greatest activity at 5-  
720 10 y and declining activity in older adults (Figure S7). We chose total accelerometry counts (11,



721 26), which sum all movement per 24-hour period, to model age-related changes in  $PA_{age}$ . We  
 722 chose total counts because activity energy expenditure should reflect the summed cost of all  
 723 activity, not only activity at moderate and vigorous intensities. Further, the amplitude of change  
 724 in moderate and vigorous activity over the lifespan is considerably larger than the observed  
 725 changes in adjusted total expenditure or adjusted activity expenditure (Figure S10). Determining  
 726 the relative contributions of different measures of physical activity to total expenditure is beyond  
 727 the scope of the simple modeling approach here and remains an important task for future  
 728 research.

729

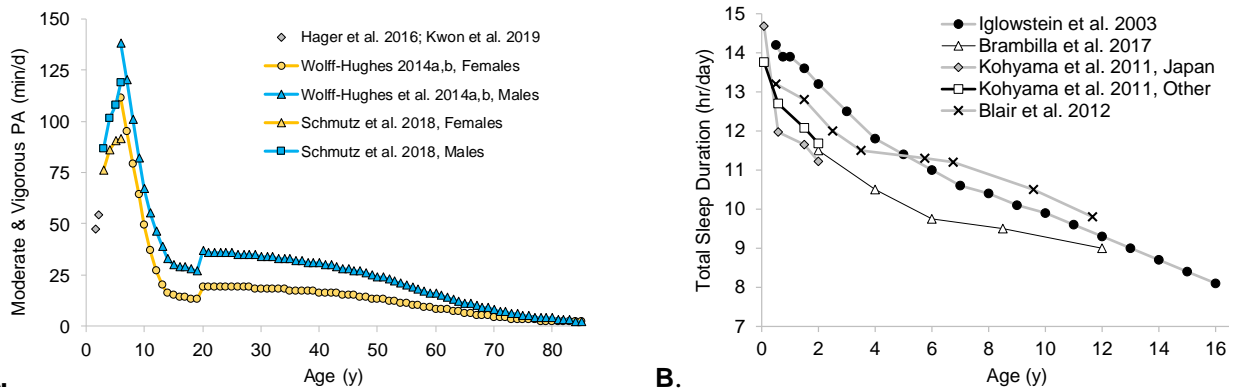

730 **A.** **Figure S7.** Modeling physical activity across the lifespan. **A.** Across studies and countries,  
 731 accelerometer-measured physical activity rises through infancy and early childhood, peaking between 5  
 732 and 10y before declining to adult levels in the teenage years (11-13, 26, 27, 48-51). Physical activity  
 733 declines again, more slowly, in older adults. The onset of decline in older adults varies somewhat across  
 734 studies, beginning between ~40 y and ~60 y. Here, physical activity is shown as minutes/day of moderate  
 735 and vigorous physical activity. Other measures (e.g., total accelerometer counts; mean counts/min, vector  
 736 magnitude) follow a similar pattern of physical activity over the life span (11, 26). **B.** The increase in  
 737 physical activity from 0 to ~10 y is mirrored by the steady decline in total daily sleep duration during this  
 738 period (52-55).  
 739

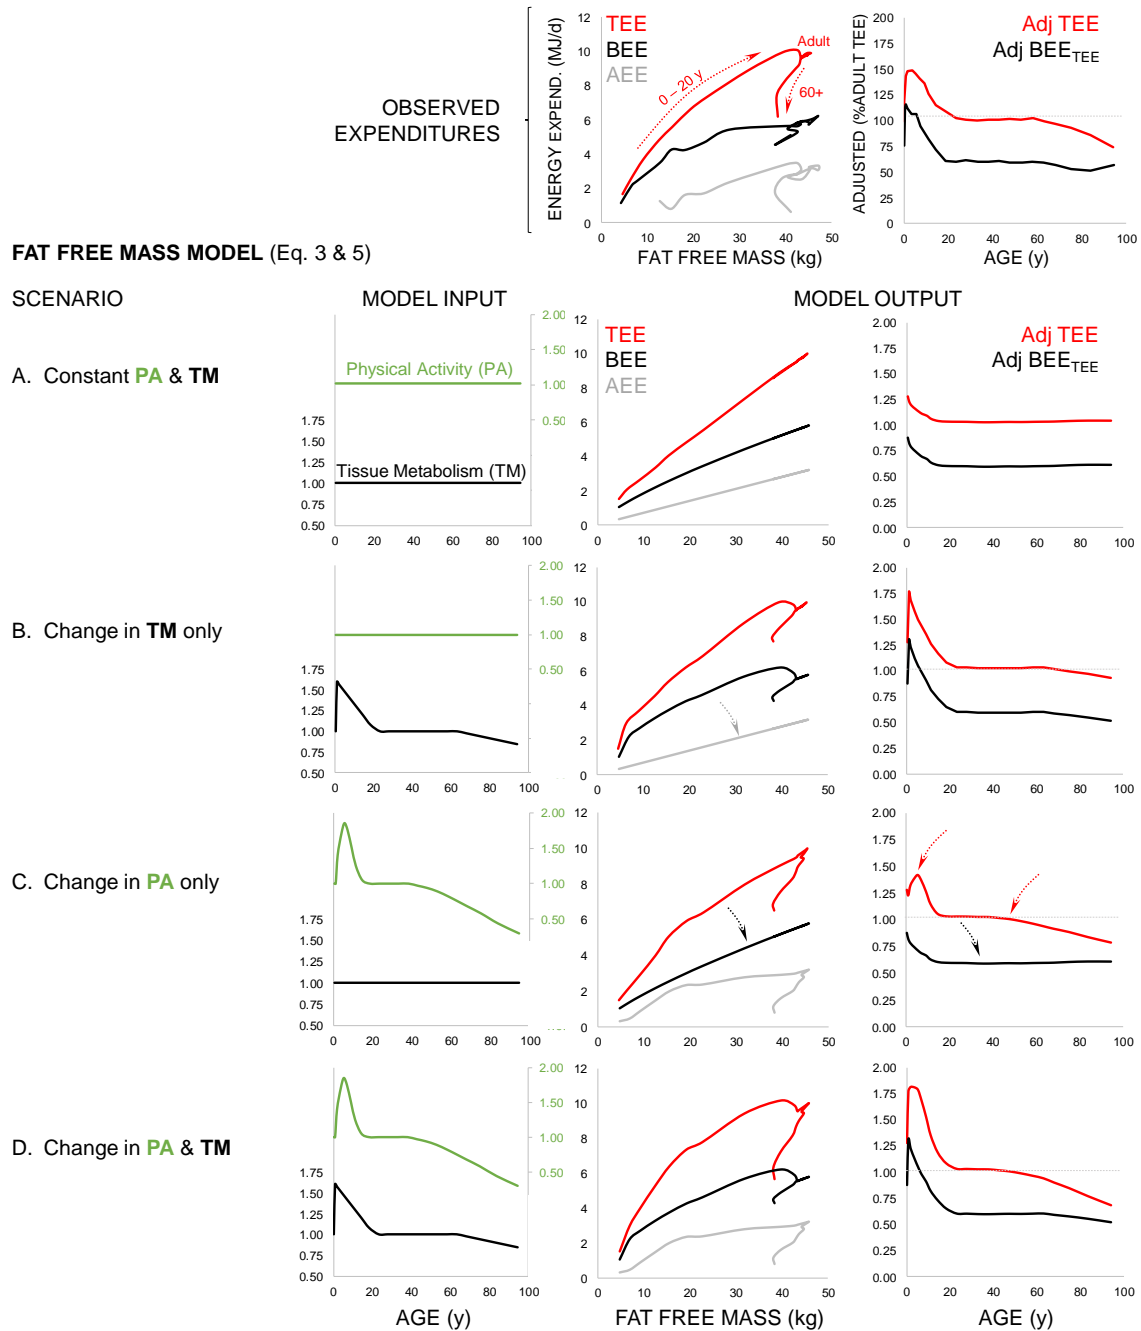

740

741

742

743

744

745

746

747

748

**Figure S8.** Results of the fat free mass model. Observed expenditures exhibit a marked age effect on the relationship between expenditure and fat free mass that is evident in both absolute (Figure 1C) and adjusted (Figure 2D) measures. **A.** If physical activity (PA) and cellular metabolism (TM) remain constant at adult levels, age effects do not emerge from the model. **B.** When only TM varies, age effects emerge for total expenditure (TEE) and basal expenditure (BEE), but not activity expenditure (AEE; gray arrow). **C.** Conversely, if only physical activity varies age effects emerge for AEE and TEE but not BEE (black arrows). Adjusted TEE also peaks later in childhood and declines earlier in adulthood (red arrows) than observed. **D.** Varying both PA and TM gives model outputs similar to observed expenditures.

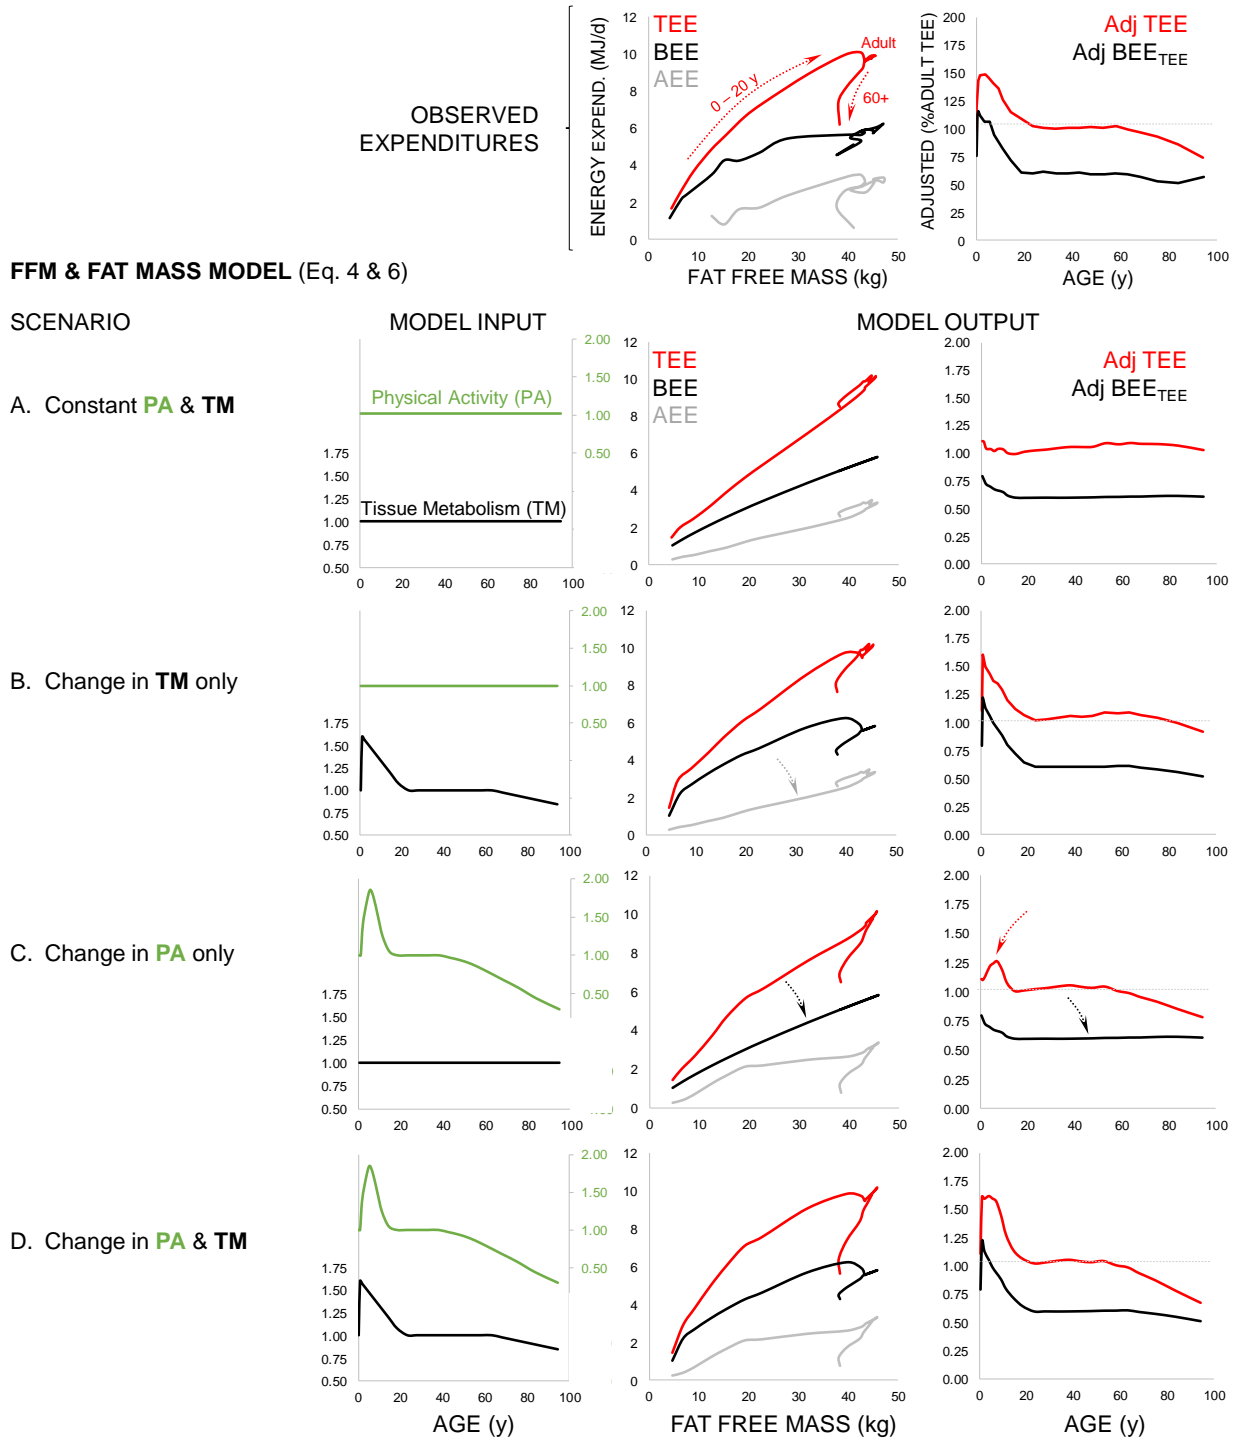

749

750 **Figure S9.** Results of the fat free mass and fat mass model. Model outputs are similar to those of the fat

751 free mass model (Figure S8). The scenario that best matches the observed relationships between fat free

752 mass, age, and expenditure is D, in which AEE is influenced by age-related variation in both physical

753 activity and cellular metabolism. Abbreviations as in Fig S8.

754 8. Physical Activity, Activity Expenditure and PAL

755 To further interrogate our simple model of expenditure and the contribution of physical  
756 activity, we examined the agreement between accelerometry-measured physical activity,  
757 adjusted activity expenditure, and modeled PAL over the lifespan. First, as noted in our  
758 discussion of the simple expenditure model (see above; Figures 3, S8, S9), moderate and  
759 vigorous physical activity and total accelerometry counts show a similar shape profile when  
760 plotted against age, but moderate and vigorous physical activity shows a greater amplitude of  
761 change over the lifespan (Figure S10). Moderate and vigorous physical activity reach a peak ~4-  
762 times greater than the mean values observed for 20 – 30 y men and women, far greater than the  
763 amplitude of change in adjusted total expenditure.

764 We used adjusted total and basal expenditures to model activity expenditure and PAL  
765 over the lifespan for comparison with published accelerometry measures of physical activity.  
766 Modeling activity expenditure and PAL was preferable because our dataset has no subjects less  
767 than 3 y with measures of both total and basal expenditure, and only 4 subjects under the age of 6  
768 y with both measures (Table S1). Using values of adjusted total expenditure and adjusted  
769  $BEE_{TEE}$  (basal expenditure expressed as a percentage of total expenditure) for age cohorts from  
770 Table S3 enabled us to model activity expenditure and PAL for this critical early period of  
771 development, in which both physical activity and expenditure change substantially. We modeled  
772 adjusted activity expenditure as  $[(\text{adjusted total expenditure}) - (\text{adjusted } BEE_{TEE})]$  and PAL as  
773  $[(\text{adjusted total expenditure}) / (\text{adjusted } BEE_{TEE})]$ , which as we show in Figure S4 correlate  
774 strongly with unadjusted measures of activity expenditure and PAL, respectively.

775 Modeled adjusted activity expenditure and PAL showed a somewhat different pattern of  
776 change over the lifecourse than either total counts or moderate and vigorous activity measured via

777 accelerometry (Figure S10). Modeled activity expenditure was most similar to total counts, rising  
778 through childhood, peaking between 10 and 20 y before falling to a stable adult level; the adult  
779 level was stable from ~30 – 75 y before declining (Figure S10). Modeled PAL rose unevenly  
780 from birth through age 20, then remained largely stable thereafter.

781           The agreement, and lack thereof, between the pattern of accelerometry-measured physical  
782 activity and modeled activity expenditure and PAL must be assessed with caution. These  
783 measures are from different samples; we do not have paired accelerometry and energy  
784 expenditure measures in the present dataset. The life course pattern of accelerometry-measured  
785 physical activity, particularly total counts, is broadly consistent with that of modeled activity  
786 expenditure. However, more work is clearly needed to determine the effects of physical activity  
787 and other factors to variation in activity expenditure and PAL over the lifecourse.

788

789

790

791

792

793

794

795

796

797

798

799

800 **9.IAEA DLW database consortium**

801 This group authorship contains the names of people whose data were contributed into the  
802 database by the analysis laboratory but they later could not be traced, or they did not respond to  
803 emails to assent inclusion among the authorship. The list also includes some researchers who did  
804 not assent inclusion because they felt their contribution was not sufficient to merit authorship

805 **Dr Stefan Branth**

806 University of Uppsala, Uppsala, Sweden

807

808 **Dr Niels C. De Bruin**

809 Erasmus University, Rotterdam, The Netherlands

810

811 **Dr Lisa H. Colbert**

812 Kinesiology, University of Wisconsin, Madison, WI,

813

814 **Dr Alice E. Dutman**

815 TNO Quality of Life, Zeist, The Netherlands

816

817 **Dr Simon D. Eaton,**

818 University college London, London, UK

819

820 **Dr Cara Ebbeling**

821 Boston Children's Hospital, Boston, Massachusetts, USA.

822

823 **Dr Sölve Elmståhl**

824 Lund University, Lund, Sweden

825

826 **Dr Mikael Fogelholm**

827 Dept of Food and Nutrition, Helsinki, Finland

828

829 **Dr Tamara Harris**

830 Aging, NIH, Bethesda, MD,

831

832 **Dr Rik Heijligenberg**

833 Academic Medical Center of Amsterdam University, Amsterdam, The Netherlands

834

835 **Dr Hans U. Jorgensen**

836 Bispebjerg Hospital, Copenhagen, Denmark

837

838 **Dr Christel L. Larsson**

839 University of Gothenburg, Gothenburg, Sweden

840

841 **Dr David S. Ludwig**

842 Boston Children's Hospital, Boston, Massachusetts, USA.  
843  
844 **Dr Margaret McCloskey**  
845 Royal Belfast Hospital for Sick Children, Belfast, Northern Ireland  
846

847 **Dr Gerwin A. Meijer**  
848 Maastricht University, Maastricht, The Netherlands  
849

850 **Dr Daphne L. Pannemans**  
851 Maastricht University, Maastricht, The Netherlands  
852

853 **Dr Renaat M. Philippaerts**  
854 Katholic University Leuven, Leuven, Belgium  
855

856 **Dr John J. Reilly**  
857 University of Strathclyde, Glasgow, UK

858 **Dr Elisabet M. Rothenberg**  
859 Göteborg University, Göteborg, Sweden  
860

861 **Dr Sabine Schulz**  
862 University of Maastricht, Maastricht, The Netherlands

863 **Dr Amy Subar**  
864 Epidemiology and Genomics, Division of Cancer Control, NIH, Bethesda, MD,  
865

866 **Dr Minna Tanskanen**  
867 University of Jyväskylä, Jyväskylä, Finland  
868

869 **Dr Ricardo Uauy**  
870 Institute of Nutrition and Food Technology (INTA), University of Chile, Santiago Chile.  
871

872 **Dr Rita Van den Berg-Emons**  
873 Maastricht University, Maastricht, The Netherlands  
874

875 **Dr Wim G. Van Gemert**  
876 Maastricht University, Maastricht, The Netherlands  
877

878 **Dr Erica J. Velthuis-te Wierik**  
879 TNO Nutrition and Food Research Institute, Zeist, The Netherlands  
880

881 **Dr Wilhelmine W. Verboeket-van de Venne**  
882 Maastricht University, Maastricht, The Netherlands  
883

884 **Dr Jeanine A. Verbunt**  
885 Maastricht University, Maastricht, The Netherlands

886  
887  
888  
889  
890  
891  
892  
893

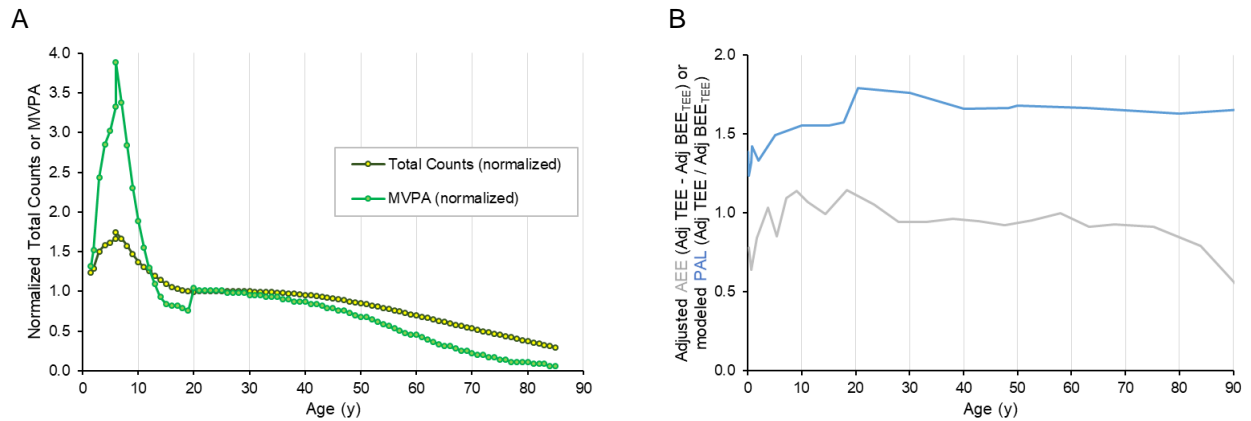

894  
895  
896  
897  
898

**Figure S10. A.** Physical activity measured via accelerometry from published analyses (11-13, 26, 27, 48-51) and **B.** modeled activity expenditure and PAL calculated from cohort means for adjusted total expenditure and adjusted BEE<sub>TEE</sub> in Table S3. Accelerometry measures and modeled activity expenditure are normalized to mean values for 20 – 30 y subjects.



**Table S1.** Key characteristics by age-sex cohort for A. Total expenditure (TEE) from the DLW database and B. subjects with basal expenditure (BEE) measurements. Activity expenditure (AEE) = 0.97TEE - BEE. \*Infant data from the literature, males and females pooled. N values for infant BEE (0 to 2 years) indicate number of entries and (number of individuals). See Methods.

| Age Group | N   |     | Age (y) |      | Height (cm) |      | Mass (kg) |      | BMI   |      | Fat Free Mass (kg) |       | Fat Mass (kg) |       | Fat% (kg) |      | BEE (MJ/d) |      | AEE (MJ/d) |      | PAL (TEE/BEE) |       |       |       |       |       |      |      |      |      |       |      |       |      |
|-----------|-----|-----|---------|------|-------------|------|-----------|------|-------|------|--------------------|-------|---------------|-------|-----------|------|------------|------|------------|------|---------------|-------|-------|-------|-------|-------|------|------|------|------|-------|------|-------|------|
|           | F   | M   | F       | M    | F           | M    | F         | M    | F     | M    | F                  | M     | F             | M     | F         | M    | F          | M    | F          | M    | F             | M     |       |       |       |       |      |      |      |      |       |      |       |      |
| (0.0-5.1) | 102 | 93  | 0.24    | 0.13 | 59.7        | 4.6  | 60.4      | 5.4  | 5.71  | 1.28 | 6.12               | 1.52  | 15.8          | 1.16  | 16.4      | 1.19 | 4.56       | 0.87 | 5.03       | 1.09 | 19.2          | 7.7   | 16.6  | 7.8   | 1.68  | 0.46  | 1.83 | 0.58 |      |      |       |      |       |      |
| (0.5-1)   | 18  | 23  | 0.68    | 0.18 | 0.72        | 0.20 | 69.1      | 4.3  | 71.8  | 4.6  | 8.54               | 1.40  | 9.17          | 1.33  | 17.8      | 2.1  | 17.7       | 1.3  | 6.32       | 0.91 | 6.94          | 1.8   | 2.23  | 0.80  | 2.23  | 0.85  | 2.53 | 0.36 | 2.90 | 0.78 |       |      |       |      |
| (1-2)     | 33  | 35  | 1.70    | 0.46 | 1.64        | 0.48 | 83.2      | 5.3  | 11.06 | 1.41 | 11.69              | 1.56  | 16.3          | 1.10  | 16.8      | 1.0  | 9.04       | 1.32 | 9.74       | 1.41 | 2.02          | 0.78  | 1.81  | 1.74  | 1.67  | 5.7   | 3.70 | 0.64 | 3.99 | 0.74 |       |      |       |      |
| (2-4)     | 54  | 48  | 3.81    | 0.28 | 3.78        | 0.31 | 101.2     | 4.6  | 102.1 | 6.1  | 16.66              | 3.38  | 17.38         | 3.03  | 16.9      | 1.0  | 12.51      | 1.85 | 13.24      | 1.85 | 4.15          | 1.91  | 4.14  | 1.69  | 24.2  | 5.5   | 23.2 | 5.8  | 4.84 | 0.70 | 5.21  | 0.89 |       |      |
| (4-6)     | 99  | 121 | 5.34    | 0.63 | 5.31        | 0.68 | 112.7     | 6.7  | 113.7 | 7.5  | 20.41              | 3.86  | 21.74         | 5.73  | 16.0      | 2.0  | 16.6       | 2.9  | 15.34      | 2.31 | 16.83         | 2.92  | 5.06  | 2.43  | 4.91  | 3.55  | 24.1 | 6.8  | 21.1 | 8.0  | 5.59  | 0.80 | 6.35  | 1.89 |
| (6-8)     | 42  | 43  | 7.03    | 0.65 | 7.25        | 0.62 | 122.5     | 10.2 | 122.5 | 10.2 | 27.62              | 8.49  | 25.71         | 5.49  | 18.0      | 3.9  | 18.2       | 2.4  | 19.28      | 3.97 | 20.14         | 2.75  | 8.34  | 5.33  | 5.57  | 3.82  | 27.8 | 10.3 | 20.3 | 8.7  | 6.62  | 1.36 | 7.20  | 1.13 |
| (8-10)    | 79  | 75  | 9.10    | 0.48 | 9.14        | 0.53 | 133.5     | 9.3  | 136.9 | 10.0 | 33.62              | 11.50 | 35.76         | 13.69 | 18.2      | 4.5  | 18.4       | 4.8  | 22.96      | 5.01 | 25.53         | 6.09  | 10.66 | 7.74  | 10.23 | 8.76  | 29.1 | 10.9 | 24.7 | 13.1 | 7.36  | 1.67 | 8.54  | 1.77 |
| (10-12)   | 69  | 34  | 11.14   | 0.58 | 11.01       | 0.47 | 148.5     | 8.0  | 143.7 | 9.6  | 45.15              | 11.65 | 44.91         | 13.45 | 20.3      | 4.1  | 21.2       | 4.4  | 31.85      | 6.35 | 30.42         | 6.63  | 13.30 | 7.90  | 14.50 | 8.25  | 27.8 | 10.3 | 30.1 | 11.2 | 8.90  | 1.88 | 9.35  | 1.68 |
| (12-16)   | 227 | 129 | 14.37   | 1.18 | 14.53       | 1.14 | 160.6     | 8.4  | 168.4 | 12.1 | 56.72              | 14.67 | 61.73         | 18.36 | 21.9      | 4.8  | 21.5       | 5.6  | 39.37      | 7.27 | 47.15         | 11.42 | 17.34 | 9.25  | 14.58 | 10.95 | 29.2 | 8.3  | 21.9 | 10.4 | 9.96  | 2.35 | 12.20 | 2.53 |
| (16-20)   | 211 | 103 | 18.32   | 0.99 | 18.37       | 1.11 | 163.9     | 7.4  | 177.9 | 7.7  | 64.31              | 16.34 | 74.36         | 16.73 | 23.9      | 5.8  | 23.5       | 4.9  | 42.49      | 7.28 | 57.11         | 7.58  | 21.82 | 11.76 | 17.25 | 12.26 | 32.3 | 8.9  | 21.5 | 10.0 | 10.08 | 1.95 | 14.02 | 2.59 |
| (20-25)   | 257 | 128 | 23.23   | 1.40 | 23.48       | 1.38 | 164.6     | 7.4  | 177.6 | 9.3  | 67.08              | 17.92 | 76.35         | 18.60 | 24.8      | 6.4  | 24.1       | 4.9  | 43.26      | 6.97 | 60.29         | 10.53 | 23.82 | 13.08 | 16.06 | 11.14 | 33.6 | 9.6  | 19.6 | 8.9  | 9.64  | 2.12 | 13.88 | 3.56 |
| (25-30)   | 238 | 149 | 32.99   | 1.36 | 32.86       | 1.41 | 164.5     | 6.2  | 177.2 | 8.0  | 73.99              | 17.78 | 79.14         | 19.56 | 27.2      | 6.3  | 25.1       | 5.4  | 45.20      | 6.63 | 59.07         | 10.51 | 28.18 | 12.96 | 20.07 | 12.78 | 36.7 | 9.0  | 24.0 | 8.7  | 9.68  | 1.65 | 12.76 | 2.79 |
| (30-35)   | 301 | 165 | 42.81   | 1.36 | 42.92       | 1.37 | 163.7     | 7.2  | 176.3 | 7.7  | 74.23              | 18.78 | 82.12         | 15.90 | 27.6      | 6.3  | 26.4       | 4.3  | 44.76      | 7.56 | 58.79         | 8.91  | 29.47 | 12.78 | 23.33 | 9.88  | 38.2 | 8.0  | 27.4 | 7.9  | 9.92  | 1.94 | 12.68 | 2.39 |
| (40-45)   | 172 | 144 | 47.43   | 1.46 | 47.76       | 1.46 | 164.6     | 6.1  | 176.8 | 7.2  | 73.18              | 17.40 | 83.74         | 15.81 | 27.4      | 6.3  | 27.2       | 4.3  | 44.02      | 6.44 | 59.52         | 8.15  | 29.15 | 12.40 | 24.21 | 9.91  | 38.4 | 7.7  | 26.4 | 8.3  | 9.90  | 1.68 | 12.90 | 2.92 |
| (45-50)   | 105 | 93  | 52.80   | 1.48 | 52.59       | 1.48 | 163.5     | 5.9  | 177.1 | 6.7  | 73.37              | 19.42 | 88.38         | 16.51 | 29.7      | 4.6  | 28.4       | 4.8  | 44.66      | 6.51 | 59.54         | 8.29  | 34.72 | 14.08 | 28.84 | 10.08 | 42.2 | 7.8  | 31.8 | 6.1  | 9.75  | 1.59 | 12.69 | 2.03 |
| (50-55)   | 111 | 76  | 58.24   | 1.48 | 57.76       | 1.38 | 163.6     | 6.2  | 177.3 | 7.6  | 75.35              | 17.07 | 87.53         | 13.91 | 28.3      | 5.7  | 27.8       | 3.7  | 43.42      | 6.06 | 60.67         | 7.13  | 31.93 | 12.22 | 26.86 | 9.42  | 41.0 | 7.7  | 30.0 | 6.7  | 9.70  | 1.54 | 13.27 | 2.97 |
| (60-65)   | 387 | 90  | 63.22   | 1.47 | 63.16       | 1.55 | 161.5     | 7.1  | 174.5 | 7.4  | 76.21              | 18.34 | 82.34         | 17.11 | 29.3      | 5.7  | 28.2       | 4.5  | 42.92      | 6.83 | 56.70         | 8.07  | 33.29 | 12.58 | 25.64 | 10.52 | 42.5 | 6.7  | 29.9 | 7.4  | 9.24  | 1.54 | 12.09 | 2.36 |
| (65-70)   | 682 | 232 | 75.05   | 2.79 | 75.40       | 2.92 | 159.4     | 6.7  | 171.3 | 8.0  | 68.50              | 14.42 | 77.19         | 14.92 | 26.9      | 5.2  | 26.2       | 4.2  | 39.62      | 5.65 | 52.29         | 7.86  | 28.88 | 10.12 | 24.90 | 8.74  | 41.1 | 6.7  | 31.4 | 6.3  | 8.21  | 1.30 | 10.17 | 1.80 |
| (80-90)   | 149 | 66  | 83.65   | 2.40 | 84.20       | 2.50 | 157.5     | 7.2  | 168.7 | 7.5  | 68.91              | 12.29 | 72.76         | 13.80 | 25.7      | 4.7  | 25.5       | 4.2  | 38.02      | 5.22 | 48.22         | 7.07  | 25.59 | 8.70  | 24.53 | 8.24  | 39.3 | 7.0  | 32.9 | 6.2  | 7.43  | 1.36 | 8.69  | 1.70 |
| (90-100)  | 22  | 8   | 94.36   | 1.79 | 94.00       | 1.85 | 158.0     | 9.1  | 168.8 | 3.0  | 58.98              | 12.81 | 62.60         | 9.47  | 23.6      | 4.1  | 22.0       | 3.4  | 38.26      | 8.50 | 45.18         | 4.93  | 20.72 | 7.23  | 17.42 | 6.93  | 34.7 | 7.9  | 26.9 | 8.9  | 6.20  | 1.20 | 7.60  | 1.03 |

**Table S2.** Model parameters for Total, Basal, and Activity Expenditure and PAL ( $p < 0.0001$  for all models)

| Total Expenditure (TEE)           |                       | Neonates (0 - 1y) |          |         |       | Juvéniles (1 - 20y)        |          |         |       | Adults (20 - 60y)        |          |         |       | Older Adults (60+ y)        |          |         |       |
|-----------------------------------|-----------------------|-------------------|----------|---------|-------|----------------------------|----------|---------|-------|--------------------------|----------|---------|-------|-----------------------------|----------|---------|-------|
| Model                             | Factors               | $\beta$           | std.err. | t-value | p     | $\beta$                    | std.err. | t-value | p     | $\beta$                  | std.err. | t-value | p     | $\beta$                     | std.err. | t-value | p     |
| 1. TEE-Body Mass+Sex+Age          | Intercept (MJ/d)      | 0.255             | 0.111    | 2.304   | 0.022 | 2.592                      | 0.118    | 22.032  | 0.000 | 5.984                    | 0.197    | 30.427  | 0.000 | 10.917                      | 0.375    | 29.130  | 0.000 |
|                                   | Body Mass (kg)        | 0.205             | 0.025    | 8.061   | 0.000 | 0.080                      | 0.004    | 22.494  | 0.000 | 0.065                    | 0.002    | 30.274  | 0.000 | 0.048                       | 0.002    | 24.701  | 0.000 |
|                                   | Sex(M)                | 0.090             | 0.046    | 1.953   | 0.052 | 1.436                      | 0.095    | 15.145  | 0.000 | 2.669                    | 0.081    | 33.036  | 0.000 | 1.659                       | 0.070    | 23.672  | 0.000 |
|                                   | Age (y)               | 0.951             | 0.205    | 4.632   | 0.000 | 0.183                      | 0.015    | 11.832  | 0.000 | -0.025                   | 0.004    | -6.635  | 0.000 | -0.080                      | 0.004    | -18.451 | 0.000 |
|                                   | model                 | N                 | SEE      | df      | adjR2 | N                          | SEE      | df      | adjR2 | N                        | SEE      | df      | adjR2 | N                           | SEE      | df      | adjR2 |
|                                   |                       | 235               | 0.343    | 231     | 0.733 | 1403                       | 1.719    | 1399    | 0.726 | 2805                     | 2.032    | 2801    | 0.482 | 1978                        | 1.311    | 1974    | 0.509 |
| 2. ln(TEE)-ln(FFM)+ln(FM)         | Intercept (MJ/d)      | -1.270            | 0.074    | -17.130 | 0.000 | -0.121                     | 0.028    | -4.259  | 0.000 | -1.102                   | 0.050    | -22.038 | 0.000 | -0.773                      | 0.062    | -12.403 | 0.000 |
|                                   | ln(Fat Free Mass; kg) | 1.163             | 0.046    | 25.311  | 0.000 | 0.696                      | 0.011    | 60.758  | 0.000 | 0.916                    | 0.013    | 71.248  | 0.000 | 0.797                       | 0.018    | 44.723  | 0.000 |
|                                   | ln(Fat Mass; kg)      | 0.053             | 0.014    | 3.862   | 0.000 | -0.041                     | 0.007    | -5.714  | 0.000 | -0.030                   | 0.005    | -5.986  | 0.000 | -0.016                      | 0.009    | -1.828  | 0.068 |
|                                   | Age (y)               | 0.254             | 0.082    | 3.104   | 0.002 | -0.012                     | 0.002    | -6.630  | 0.000 | 0.000                    | 0.000    | 0.765   | 0.444 | -0.008                      | 0.000    | -19.038 | 0.000 |
|                                   | model                 | N                 | SEE      | df      | adjR2 | N                          | SEE      | df      | adjR2 | N                        | SEE      | df      | adjR2 | N                           | SEE      | df      | adjR2 |
|                                   |                       | 235               | 0.160    | 232     | 0.796 | 1403                       | 0.154    | 1400    | 0.842 | 2805                     | 0.142    | 2802    | 0.646 | 1978                        | 0.139    | 1975    | 0.533 |
| 3. ln(TEE)-ln(FFM)+ln(FM)+Sex+Age | Intercept (MJ/d)      | -1.122            | 0.089    | -12.619 | 0.000 | -0.348                     | 0.044    | -7.956  | 0.000 | -1.118                   | 0.069    | -16.129 | 0.000 | 0.092                       | 0.089    | 1.032   | 0.302 |
|                                   | ln(Fat Free Mass; kg) | 1.025             | 0.067    | 15.215  | 0.000 | 0.784                      | 0.021    | 38.119  | 0.000 | 0.920                    | 0.020    | 45.942  | 0.000 | 0.736                       | 0.025    | 29.883  | 0.000 |
|                                   | ln(Fat Mass; kg)      | 0.034             | 0.015    | 2.294   | 0.023 | -0.019                     | 0.007    | -2.622  | 0.009 | -0.032                   | 0.006    | -5.149  | 0.000 | -0.030                      | 0.010    | -3.118  | 0.002 |
|                                   | Sex(M)                | -0.014            | 0.021    | -0.644  | 0.520 | 0.067                      | 0.009    | 7.592   | 0.000 | -0.002                   | 0.009    | -0.249  | 0.803 | 0.010                       | 0.010    | 1.042   | 0.298 |
|                                   | Age (y)               | 0.254             | 0.082    | 3.104   | 0.002 | -0.012                     | 0.002    | -6.630  | 0.000 | 0.000                    | 0.000    | 0.765   | 0.444 | -0.008                      | 0.000    | -19.038 | 0.000 |
|                                   | model                 | N                 | SEE      | df      | adjR2 | N                          | SEE      | df      | adjR2 | N                        | SEE      | df      | adjR2 | N                           | SEE      | df      | adjR2 |
|                                   |                       | 235               | 0.157    | 230     | 0.804 | 1403                       | 0.147    | 1398    | 0.857 | 2805                     | 0.142    | 2800    | 0.646 | 1978                        | 0.128    | 1973    | 0.606 |
| <b>Basal Expenditure (BEE)</b>    |                       |                   |          |         |       | <b>Juvéniles (1 - 20y)</b> |          |         |       | <b>Adults (20 - 60y)</b> |          |         |       | <b>Older Adults (60+ y)</b> |          |         |       |
| Model                             | Factors               | $\beta$           | std.err. | t-value | p     | $\beta$                    | std.err. | t-value | p     | $\beta$                  | std.err. | t-value | p     | $\beta$                     | std.err. | t-value | p     |
| 4. BEE-Body Mass+Sex+Age          | Intercept (MJ/d)      | 2.965             | 0.158    | 18.785  | 0.000 | 3.649                      | 0.104    | 34.943  | 0.000 | 5.905                    | 0.379    | 15.571  | 0.000 | 5.905                       | 0.379    | 15.571  | 0.000 |
|                                   | Body Mass (kg)        | 0.034             | 0.003    | 11.004  | 0.000 | 0.036                      | 0.001    | 32.494  | 0.000 | 0.031                    | 0.002    | 14.277  | 0.000 | 0.031                       | 0.002    | 14.277  | 0.000 |
|                                   | Sex(M)                | 1.185             | 0.101    | 11.733  | 0.000 | 1.263                      | 0.045    | 27.915  | 0.000 | 0.724                    | 0.066    | 10.939  | 0.000 | 0.724                       | 0.066    | 10.939  | 0.000 |
|                                   | Age (y)               | 0.033             | 0.015    | 2.212   | 0.028 | -0.008                     | 0.002    | -3.487  | 0.001 | -0.041                   | 0.004    | -9.501  | 0.000 | -0.041                      | 0.004    | -9.501  | 0.000 |
|                                   | model                 | N                 | SEE      | df      | adjR2 | N                          | SEE      | df      | adjR2 | N                        | SEE      | df      | adjR2 | N                           | SEE      | df      | adjR2 |
|                                   |                       | 345               | 0.848    | 341     | 0.581 | 1036                       | 0.694    | 1032    | 0.682 | 621                      | 0.761    | 617     | 0.520 | 621                         | 0.761    | 617     | 0.520 |
| 5. ln(BEE)-ln(FFM)+ln(FM)         | Intercept (MJ/d)      | 0.055             | 0.078    | 0.706   | 0.480 | -0.954                     | 0.059    | -16.176 | 0.000 | -0.923                   | 0.099    | -9.350  | 0.000 | -0.923                      | 0.099    | -9.350  | 0.000 |
|                                   | ln(Fat Free Mass; kg) | 0.535             | 0.028    | 19.103  | 0.000 | 0.707                      | 0.016    | 45.353  | 0.000 | 0.656                    | 0.027    | 24.640  | 0.000 | 0.656                       | 0.027    | 24.640  | 0.000 |
|                                   | ln(Fat Mass; kg)      | -0.095            | 0.014    | -6.784  | 0.000 | 0.019                      | 0.006    | 3.408   | 0.001 | 0.028                    | 0.015    | 1.819   | 0.069 | 0.028                       | 0.015    | 1.819   | 0.069 |
|                                   | Age (y)               | -0.018            | 0.003    | -5.102  | 0.000 | -0.001                     | 0.000    | -2.124  | 0.034 | -0.006                   | 0.001    | -8.814  | 0.000 | -0.006                      | 0.001    | -8.814  | 0.000 |
|                                   | model                 | N                 | SEE      | df      | adjR2 | N                          | SEE      | df      | adjR2 | N                        | SEE      | df      | adjR2 | N                           | SEE      | df      | adjR2 |
|                                   |                       | 345               | 0.153    | 342     | 0.573 | 1036                       | 0.103    | 1033    | 0.688 | 621                      | 0.135    | 618     | 0.530 | 621                         | 0.135    | 618     | 0.530 |
| 6. ln(BEE)-ln(FFM)+ln(FM)+Sex+Age | Intercept (MJ/d)      | -0.270            | 0.100    | -2.704  | 0.007 | -0.497                     | 0.079    | -6.281  | 0.000 | -0.089                   | 0.151    | -0.587  | 0.557 | -0.089                      | 0.151    | -0.587  | 0.557 |
|                                   | ln(Fat Free Mass; kg) | 0.663             | 0.044    | 15.167  | 0.000 | 0.561                      | 0.023    | 24.008  | 0.000 | 0.549                    | 0.040    | 13.663  | 0.000 | 0.549                       | 0.040    | 13.663  | 0.000 |
|                                   | ln(Fat Mass; kg)      | -0.054            | 0.014    | -4.005  | 0.000 | 0.054                      | 0.007    | 7.809   | 0.000 | 0.042                    | 0.016    | 2.619   | 0.009 | 0.042                       | 0.016    | 2.619   | 0.009 |
|                                   | Sex(M)                | 0.090             | 0.019    | 4.780   | 0.000 | 0.086                      | 0.010    | 8.297   | 0.000 | 0.037                    | 0.016    | 2.288   | 0.022 | 0.037                       | 0.016    | 2.288   | 0.022 |
|                                   | Age (y)               | -0.018            | 0.003    | -5.102  | 0.000 | -0.001                     | 0.000    | -2.124  | 0.034 | -0.006                   | 0.001    | -8.814  | 0.000 | -0.006                      | 0.001    | -8.814  | 0.000 |
|                                   | model                 | N                 | SEE      | df      | adjR2 | N                          | SEE      | df      | adjR2 | N                        | SEE      | df      | adjR2 | N                           | SEE      | df      | adjR2 |
|                                   |                       | 345               | 0.137    | 340     | 0.658 | 1036                       | 0.100    | 1031    | 0.708 | 621                      | 0.128    | 616     | 0.582 | 621                         | 0.128    | 616     | 0.582 |
| <b>Activity Expenditure (AEE)</b> |                       |                   |          |         |       | <b>Juvéniles (1 - 20y)</b> |          |         |       | <b>Adults (20 - 60y)</b> |          |         |       | <b>Older Adults (60+ y)</b> |          |         |       |
| Model                             | Factors               | $\beta$           | std.err. | t-value | p     | $\beta$                    | std.err. | t-value | p     | $\beta$                  | std.err. | t-value | p     | $\beta$                     | std.err. | t-value | p     |
| 7. AEE-Body Mass+Sex+Age          | Intercept (MJ/d)      | -0.481            | 0.237    | -2.030  | 0.043 | 1.822                      | 0.252    | 7.231   | 0.000 | 5.835                    | 0.604    | 9.663   | 0.000 | 5.835                       | 0.604    | 9.663   | 0.000 |
|                                   | Body Mass (kg)        | 0.032             | 0.005    | 6.774   | 0.000 | 0.023                      | 0.003    | 8.870   | 0.000 | 0.014                    | 0.003    | 4.111   | 0.000 | 0.014                       | 0.003    | 4.111   | 0.000 |
|                                   | Sex(M)                | 0.999             | 0.152    | 6.581   | 0.000 | 1.308                      | 0.109    | 11.983  | 0.000 | 0.661                    | 0.105    | 6.264   | 0.000 | 0.661                       | 0.105    | 6.264   | 0.000 |
|                                   | Age (y)               | 0.113             | 0.022    | 5.133   | 0.000 | -0.012                     | 0.006    | -2.216  | 0.027 | -0.058                   | 0.007    | -8.354  | 0.000 | -0.058                      | 0.007    | -8.354  | 0.000 |
|                                   | model                 | N                 | SEE      | df      | adjR2 | N                          | SEE      | df      | adjR2 | N                        | SEE      | df      | adjR2 | N                           | SEE      | df      | adjR2 |
|                                   |                       | 345               | 1.275    | 341     | 0.476 | 1036                       | 1.675    | 1032    | 0.201 | 621                      | 1.212    | 617     | 0.219 | 621                         | 1.212    | 617     | 0.219 |
| 8. ln(AEE)-ln(FFM)+ln(FM)         | Intercept (MJ/d)      | -3.330            | 0.231    | -14.447 | 0.000 | -4.124                     | 0.248    | -16.627 | 0.000 | -2.556                   | 0.401    | -6.381  | 0.000 | -2.556                      | 0.401    | -6.381  | 0.000 |
|                                   | ln(Fat Free Mass; kg) | 1.301             | 0.082    | 15.776  | 0.000 | 1.476                      | 0.065    | 22.614  | 0.000 | 0.952                    | 0.108    | 8.807   | 0.000 | 0.952                       | 0.108    | 8.807   | 0.000 |
|                                   | ln(Fat Mass; kg)      | -0.099            | 0.041    | -2.414  | 0.016 | -0.142                     | 0.023    | -6.130  | 0.000 | -0.042                   | 0.062    | -0.685  | 0.494 | -0.042                      | 0.062    | -0.685  | 0.494 |
|                                   | Age (y)               | 0.006             | 0.062    | 0.090   | 0.928 | -0.198                     | 0.044    | -4.480  | 0.000 | 0.079                    | 0.067    | 1.181   | 0.238 | 0.079                       | 0.067    | 1.181   | 0.238 |
|                                   | model                 | N                 | SEE      | df      | adjR2 | N                          | SEE      | df      | adjR2 | N                        | SEE      | df      | adjR2 | N                           | SEE      | df      | adjR2 |
|                                   |                       | 338               | 0.445    | 335     | 0.550 | 1023                       | 0.423    | 1020    | 0.333 | 612                      | 0.546    | 609     | 0.116 | 612                         | 0.546    | 609     | 0.116 |
| 9. ln(AEE)-ln(FFM)+ln(FM)+Sex+Age | Intercept (MJ/d)      | -3.437            | 0.332    | -10.366 | 0.000 | -5.194                     | 0.342    | -15.187 | 0.000 | 0.222                    | 0.625    | 0.355   | 0.723 | 0.222                       | 0.625    | 0.355   | 0.723 |
|                                   | ln(Fat Free Mass; kg) | 1.349             | 0.145    | 9.295   | 0.000 | 1.816                      | 0.100    | 18.079  | 0.000 | 0.674                    | 0.165    | 4.088   | 0.000 | 0.674                       | 0.165    | 4.088   | 0.000 |
|                                   | ln(Fat Mass; kg)      | -0.093            | 0.044    | -2.097  | 0.037 | -0.221                     | 0.029    | -7.598  | 0.000 | -0.010                   | 0.066    | -0.151  | 0.880 | -0.010                      | 0.066    | -0.151  | 0.880 |
|                                   | Sex(M)                | 0.006             | 0.062    | 0.090   | 0.928 | -0.198                     | 0.044    | -4.480  | 0.000 | 0.079                    | 0.067    | 1.181   | 0.238 | 0.079                       | 0.067    | 1.181   | 0.238 |
|                                   | Age (y)               | -0.005            | 0.011    | -0.474  | 0.636 | 0.002                      | 0.001    | 1.162   | 0.246 | -0.025                   | 0.003    | -7.852  | 0.000 | -0.025                      | 0.003    | -7.852  | 0.000 |
|                                   | model                 | N                 | SEE      | df      | adjR2 | N                          | SEE      | df      | adjR2 | N                        | SEE      | df      | adjR2 | N                           | SEE      | df      | adjR2 |
|                                   |                       | 338               | 0.446    | 333     | 0.547 | 1023                       | 0.420    | 1018    | 0.345 | 612                      | 0.521    | 607     | 0.195 | 612                         | 0.521    | 607     | 0.195 |
| <b>PAL (TEE/BEE)</b>              |                       |                   |          |         |       | <b>Juvéniles (1 - 20y)</b> |          |         |       | <b>Adults (20 - 60y)</b> |          |         |       | <b>Older Adults (60+ y)</b> |          |         |       |
| Model                             | Factors               | $\beta$           | std.err. | t-value | p     | $\beta$                    | std.err. | t-value | p     | $\beta$                  | std.err. | t-value | p     | $\beta$                     | std.err. | t-value | p     |
| 10. PAL-Body Mass+Sex+Age         | Intercept (MJ/d)      | 1.290             | 0.048    | 26.913  | 0.000 | 1.668                      | 0.041    | 40.739  | 0.000 | 2.209                    | 0.144    | 15.348  | 0.000 | 2.209                       | 0.144    | 15.348  | 0.000 |
|                                   | Body Mass (kg)        | 0.002             | 0.001    | 2.093   | 0.037 | 0.001                      | 0.000    | 2.058   | 0.040 | 0.000                    | 0.001    | -0.239  | 0.811 | 0.000                       | 0.001    | -0.239  | 0.811 |
|                                   | Sex(M)                | 0.050             | 0.031    | 1.641   | 0.102 | 0.094                      | 0.018    | 5.312   | 0.000 | 0.058                    | 0.025    | 2.298   | 0.022 | 0.058                       | 0.025    | 2.298   | 0.022 |
|                                   | Age (y)               | 0.022             | 0.004    | 4.933   |       |                            |          |         |       |                          |          |         |       |                             |          |         |       |

**Table S3.** Adjusted total expenditure (TEE), Adjusted basal expenditure (BEE), and Adjusted BEE<sub>TEE</sub>. \*Infant data from the literature, males and females pooled. N values for infant BEE (0 to 2 years) indicate number of entries and (number of individuals).

|          |     | Adjusted TEE - Female & Male Cohorts |      |      |       |      |       |      |           | Adjusted BEE and Adjusted BEE <sub>TEE</sub> |      |      |        |      |                             |      |        |      |       |      |
|----------|-----|--------------------------------------|------|------|-------|------|-------|------|-----------|----------------------------------------------|------|------|--------|------|-----------------------------|------|--------|------|-------|------|
|          |     | Adjusted TEE                         |      |      |       |      |       |      |           | Adjusted BEE                                 |      |      |        |      | Adjusted BEE <sub>TEE</sub> |      |        |      |       |      |
| Age      | N   | mean Age                             |      | F    |       | M    |       | N    |           | mean Age                                     |      | F    |        | M    |                             | F    |        | M    |       |      |
| Cohort   | F   | M                                    | F    | M    | mean  | sd   | mean  | sd   | F         | M                                            | F    | M    | mean   | sd   | mean                        | sd   | mean   | sd   | mean  | sd   |
| (0,0.5]  | 103 | 93                                   | 0.2  | 0.2  | 120.0 | 23.2 | 118.4 | 23.2 | 22 (111)* |                                              | 0.2  |      | 100.47 |      | 33.89                       |      | 86.03  |      | 28.9  |      |
| (0.5,1]  | 18  | 23                                   | 0.7  | 0.7  | 139.8 | 17.0 | 145.5 | 25.7 | 20 (88)*  |                                              | 0.9  |      | 142.89 |      | 11.62                       |      | 115.47 |      | 9.2   |      |
| (1,2]    | 33  | 35                                   | 1.7  | 1.6  | 147.4 | 23.9 | 148.2 | 21.6 | 18 (86)*  |                                              | 1.6  |      | 142.02 |      | 13.52                       |      | 111.94 |      | 9.6   |      |
| (2,4]    | 54  | 48                                   | 3.8  | 3.8  | 147.0 | 13.4 | 150.3 | 19.6 | 3         | 1                                            | 3.8  | 4.0  | 150.2  | 6.0  | 144.3                       | NA   | 108.6  | 7.4  | 100.7 | NA   |
| (4,6]    | 99  | 121                                  | 5.3  | 5.3  | 142.5 | 14.0 | 148.2 | 18.5 | 9         | 5                                            | 5.7  | 5.4  | 156.4  | 26.3 | 158.8                       | 30.9 | 110.1  | 19.9 | 108.1 | 19.9 |
| (6,8]    | 42  | 42                                   | 7.0  | 7.2  | 139.2 | 16.7 | 143.2 | 13.6 | 18        | 12                                           | 7.2  | 7.4  | 136.9  | 25.8 | 141.9                       | 21.8 | 94.6   | 17.7 | 94.6  | 15.1 |
| (8,10]   | 79  | 75                                   | 9.1  | 9.1  | 132.8 | 19.2 | 140.2 | 18.7 | 22        | 16                                           | 9.2  | 9.5  | 130.0  | 23.4 | 137.3                       | 21.8 | 87.2   | 15.2 | 88.8  | 14.2 |
| (10,12]  | 68  | 34                                   | 11.1 | 11.0 | 122.0 | 23.4 | 133.4 | 16.3 | 5         | 5                                            | 11.1 | 11.1 | 128.3  | 19.9 | 126.3                       | 21.2 | 82.6   | 12.3 | 81.8  | 15.0 |
| (12,16]  | 229 | 128                                  | 14.4 | 14.5 | 113.1 | 22.9 | 118.9 | 21.4 | 18        | 16                                           | 14.4 | 13.9 | 103.1  | 18.6 | 130.0                       | 23.3 | 64.9   | 12.2 | 82.4  | 15.7 |
| (16,20]  | 209 | 103                                  | 18.3 | 18.4 | 107.1 | 14.4 | 113.3 | 17.1 | 155       | 148                                          | 18.5 | 18.9 | 97.5   | 12.9 | 109.3                       | 7.5  | 60.2   | 8.1  | 62.9  | 5.3  |
| (20,25]  | 252 | 123                                  | 23.2 | 23.5 | 100.6 | 15.5 | 106.7 | 21.9 | 135       | 116                                          | 23.4 | 23.8 | 98.3   | 10.5 | 99.6                        | 8.1  | 60.6   | 7.1  | 57.0  | 5.2  |
| (25,30]  | 280 | 182                                  | 27.8 | 28.0 | 100.5 | 15.3 | 102.0 | 21.2 | 115       | 104                                          | 27.9 | 27.9 | 100.8  | 11.5 | 104.0                       | 13.4 | 62.5   | 7.8  | 59.6  | 8.3  |
| (30,35]  | 235 | 146                                  | 33.0 | 32.8 | 100.0 | 11.9 | 100.7 | 16.5 | 96        | 94                                           | 33.2 | 33.1 | 98.7   | 9.7  | 103.3                       | 10.4 | 60.9   | 6.3  | 59.7  | 7.0  |
| (35,40]  | 231 | 165                                  | 38.0 | 38.0 | 100.0 | 11.9 | 102.3 | 16.3 | 112       | 110                                          | 38.1 | 38.2 | 99.7   | 10.2 | 101.6                       | 11.7 | 61.4   | 6.9  | 59.1  | 7.2  |
| (40,45]  | 301 | 165                                  | 42.8 | 42.9 | 101.3 | 12.6 | 100.8 | 13.2 | 100       | 96                                           | 42.9 | 42.6 | 99.8   | 10.4 | 102.9                       | 9.1  | 61.6   | 6.9  | 59.7  | 6.1  |
| (45,50]  | 171 | 144                                  | 47.4 | 47.8 | 102.0 | 12.4 | 100.5 | 14.3 | 42        | 41                                           | 47.3 | 48.1 | 99.0   | 14.7 | 108.1                       | 14.6 | 61.4   | 9.6  | 62.7  | 8.9  |
| (50,55]  | 105 | 93                                   | 52.8 | 52.6 | 100.5 | 11.4 | 100.8 | 13.2 | 33        | 33                                           | 53.1 | 53.4 | 96.1   | 9.1  | 103.1                       | 9.2  | 59.8   | 5.5  | 60.3  | 5.9  |
| (55,60]  | 111 | 76                                   | 58.2 | 57.8 | 102.2 | 11.7 | 102.9 | 20.0 | 23        | 23                                           | 58.1 | 57.5 | 100.3  | 9.5  | 100.0                       | 7.1  | 62.5   | 6.1  | 57.9  | 4.5  |
| (60,65]  | 252 | 90                                   | 63.2 | 63.2 | 98.8  | 12.4 | 99.8  | 15.3 | 23        | 21                                           | 62.4 | 63.1 | 99.5   | 12.8 | 99.2                        | 8.5  | 62.6   | 8.3  | 58.3  | 5.2  |
| (65,70]  | 387 | 90                                   | 68.0 | 68.0 | 97.6  | 10.9 | 94.4  | 11.1 | 40        | 40                                           | 68.0 | 68.7 | 91.0   | 8.6  | 95.2                        | 7.6  | 56.9   | 5.9  | 56.4  | 4.8  |
| (70,80]  | 681 | 232                                  | 75.1 | 75.4 | 93.9  | 12.1 | 90.6  | 14.6 | 188       | 173                                          | 75.2 | 75.4 | 86.8   | 9.9  | 86.4                        | 12.9 | 55.2   | 6.6  | 51.5  | 8.0  |
| (80,90]  | 149 | 66                                   | 83.6 | 84.2 | 87.6  | 12.2 | 82.8  | 13.0 | 47        | 38                                           | 84.1 | 84.0 | 86.5   | 16.0 | 78.6                        | 10.8 | 55.3   | 10.8 | 47.6  | 6.8  |
| (90,100] | 22  | 8                                    | 94.4 | 94.0 | 73.2  | 12.4 | 76.0  | 9.6  | 14        | 5                                            | 94.9 | 94.0 | 91.2   | 19.1 | 94.8                        | 14.6 | 57.1   | 12.9 | 57.3  | 8.6  |

902 **Table S4.** Segmented Regression Analyses

| <b>adjTEE</b> | <b>Segments</b> |           |                 |                 | <b>Break Points</b> |                 |                 |
|---------------|-----------------|-----------|-----------------|-----------------|---------------------|-----------------|-----------------|
|               | <i>beta</i>     | <i>SE</i> | <i>CI_lower</i> | <i>CI_upper</i> | <i>Estimate</i>     | <i>CI_lower</i> | <i>CI_upper</i> |
|               | 84.70           | 7.15      | 70.69           | 98.71           | 0.69                | 0.61            | 0.76            |
|               | -2.77           | 0.07      | -2.91           | -2.63           | 20.46               | 19.77           | 21.15           |
|               | -0.02           | 0.02      | -0.07           | 0.03            | 62.99               | 60.13           | 65.85           |
|               | -0.68           | 0.06      | -0.79           | -0.57           |                     |                 |                 |

  

| <b>adjBEE</b> | <b>Segments</b> |           |                 |                 | <b>Break Points</b> |                 |                 |
|---------------|-----------------|-----------|-----------------|-----------------|---------------------|-----------------|-----------------|
|               | <i>beta</i>     | <i>SE</i> | <i>CI_lower</i> | <i>CI_upper</i> | <i>Estimate</i>     | <i>CI_lower</i> | <i>CI_upper</i> |
|               | 75.51           | 5.59      | 64.55           | 86.46           | 1.04                | 0.94            | 1.14            |
|               | -3.75           | 0.22      | -4.17           | -3.33           | 18.00               | 16.82           | 19.18           |
|               | 0.02            | 0.05      | -0.07           | 0.12            | 46.46               | 40.57           | 52.35           |
|               | -0.45           | 0.04      | -0.53           | -0.37           |                     |                 |                 |

903
